# Supplementary material
Source: MDPI journal article supplement (https://www.mdpi.com/2072-4292/9/7/688)
Supplement: s1 [file s1]

# Supplementary Materials: Object-based classification of grasslands from high resolution satellite image time series using Gaussian mean map kernels

Mailys Lopes, Mathieu Fauvel, Stéphane Girard and David Sheeren

## 1 List of Figures

|   |    |                                                                                                                                                                                                                              |   |
|---|----|------------------------------------------------------------------------------------------------------------------------------------------------------------------------------------------------------------------------------|---|
| 2 | S1 | True color composite images of the Formosat-2 time series of 2014 (© CNES/Kalideos NSPO - Distribution Airbus DS). . . . .                                                                                                   | 2 |
| 3 |    |                                                                                                                                                                                                                              |   |
| 4 | S2 | Boxplot of Kappa coefficient repartitions for the classification of the old and young grasslands. The line in the box stands for the median whereas the dot stands for the mean. . . . .                                     | 3 |
| 5 |    |                                                                                                                                                                                                                              |   |
| 6 | S3 | Boxplot of Kappa coefficient repartitions for classification of management practices using time series of year (a) 2013 and (b) 2014. The line in the box stands for the median whereas the dot stands for the mean. . . . . | 4 |
| 7 |    |                                                                                                                                                                                                                              |   |
| 8 |    |                                                                                                                                                                                                                              |   |

## 9 List of Tables

|    |    |                                                                                                                                             |   |
|----|----|---------------------------------------------------------------------------------------------------------------------------------------------|---|
| 10 | S1 | Average user accuracy (UA) and producer accuracy (PA) (%) over the 100 repetitions for each class, 1: Old, 2: Young. . . . .                | 3 |
| 11 |    |                                                                                                                                             |   |
| 12 | S2 | Average user accuracy (UA) and producer accuracy (PA) (%) over the 100 repetitions for each class, 1: Mowing, 2: Mixed, 3: Grazing. . . . . | 4 |
| 13 |    |                                                                                                                                             |   |

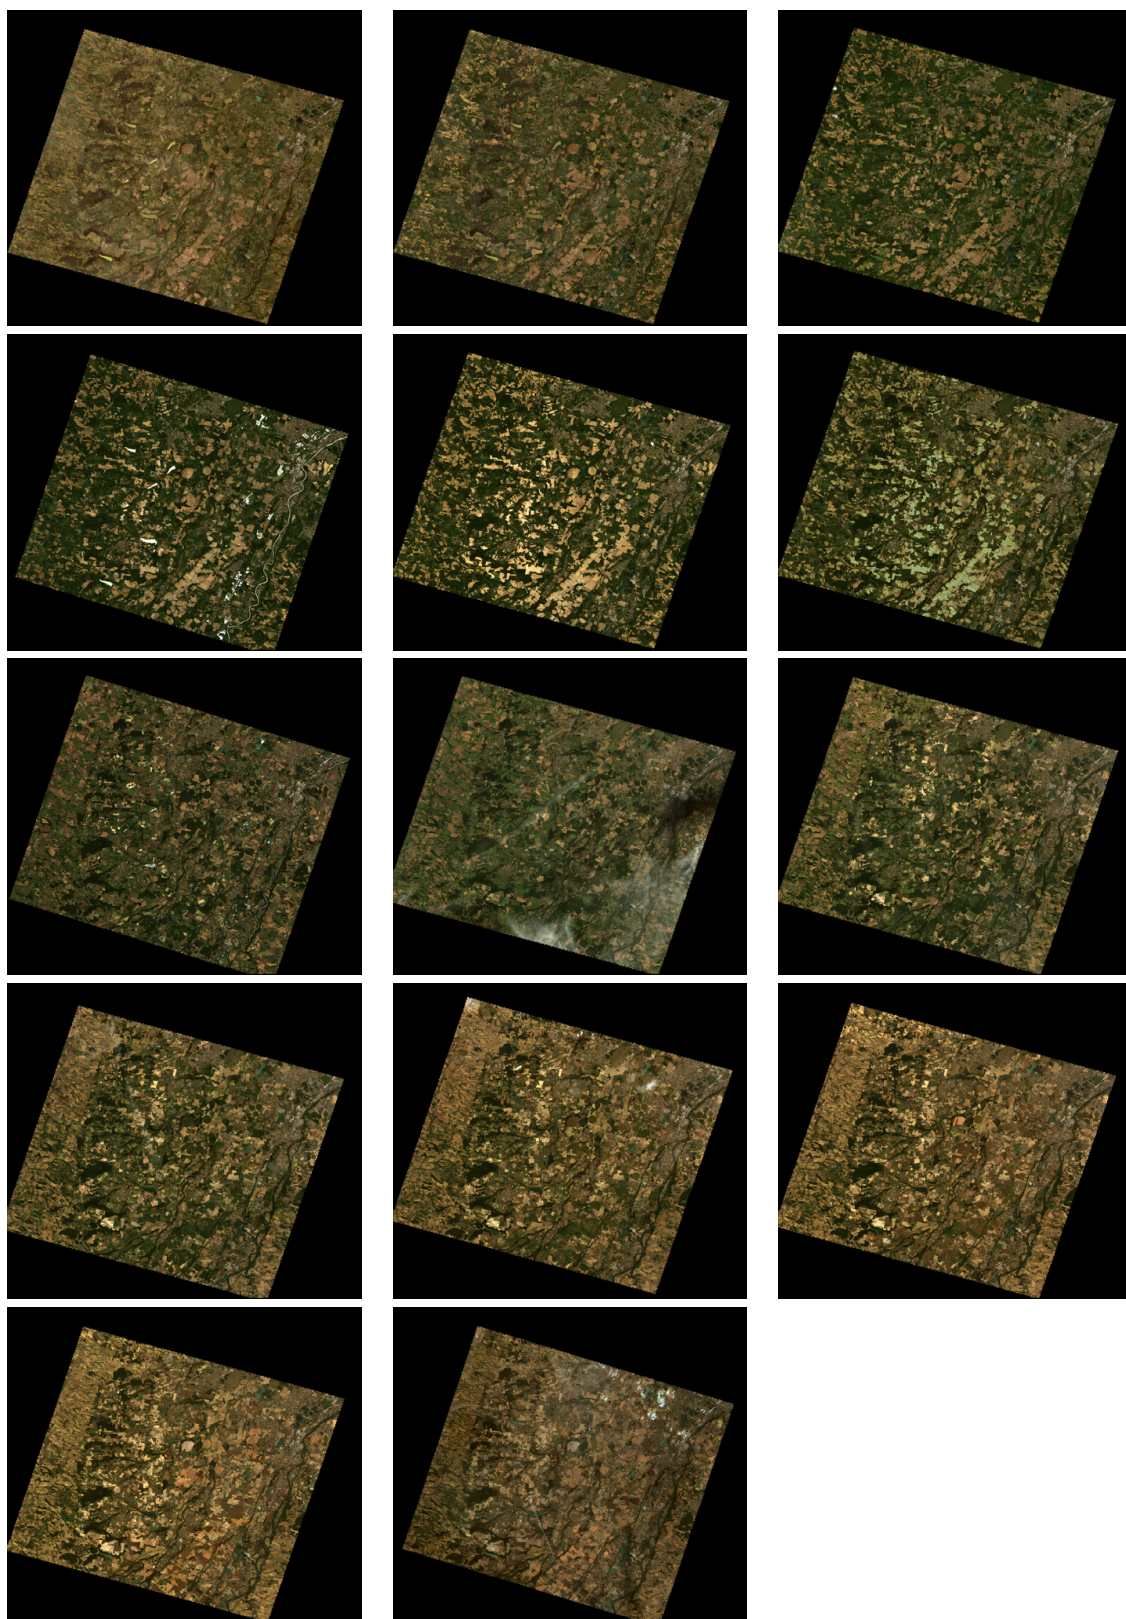

**Figure S1.** True color composite images of the Formosat-2 time series of 2014 (© CNES/Kalideos NSPO - Distribution Airbus DS).

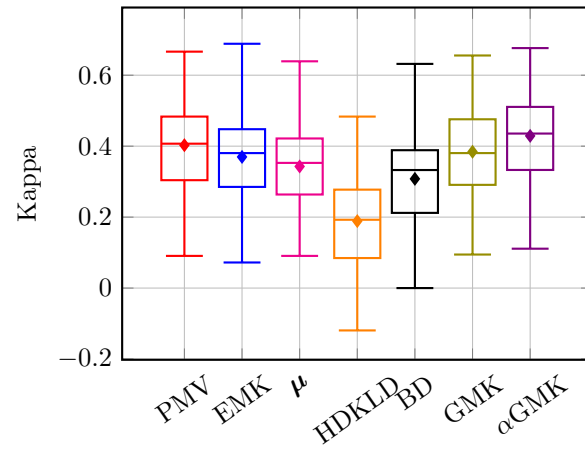

**Figure S2.** Boxplot of Kappa coefficient repartitions for the classification of the old and young grasslands. The line in the box stands for the median whereas the dot stands for the mean.

**Table S1.** Average user accuracy (UA) and producer accuracy (PA) (%) over the 100 repetitions for each class, 1: Old, 2: Young.

|              | UA1  | UA2  | PA1  | PA2  |
|--------------|------|------|------|------|
| PMV          | 85.8 | 90.9 | 30.9 | 99.2 |
| EMK          | 70.0 | 90.8 | 30.9 | 97.9 |
| $\mu$        | 60.3 | 90.8 | 31.5 | 96.7 |
| HDKLD        | 31.8 | 89.7 | 27.5 | 90.8 |
| BD           | 65.4 | 90.1 | 26.3 | 97.5 |
| GMK          | 65.5 | 91.1 | 34.4 | 97.0 |
| $\alpha$ GMK | 74.7 | 91.4 | 36.6 | 97.9 |

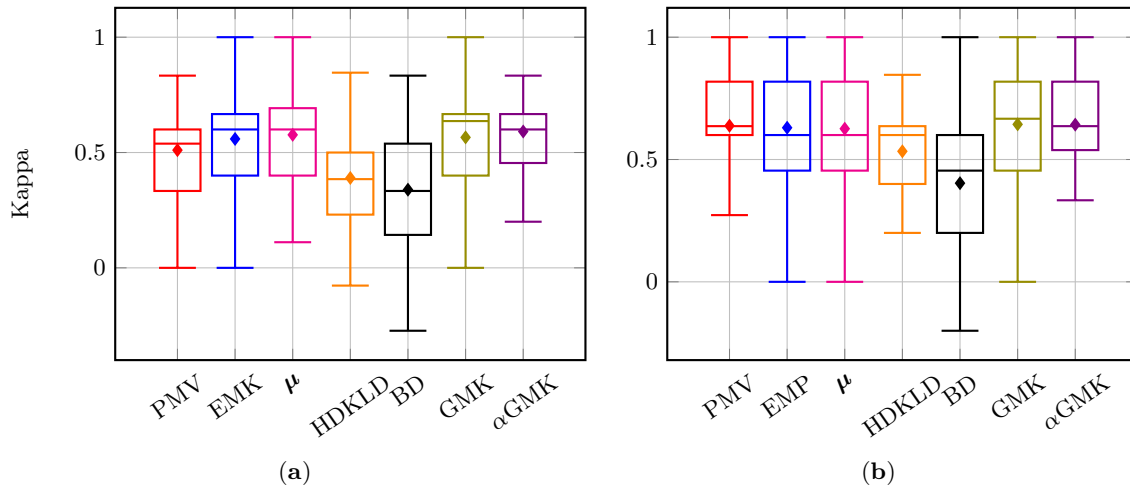

**Figure S3.** Boxplot of Kappa coefficient repartitions for classification of management practices using time series of year (a) 2013 and (b) 2014. The line in the box stands for the median whereas the dot stands for the mean.

**Table S2.** Average user accuracy (UA) and producer accuracy (PA) (%) over the 100 repetitions for each class, 1: Mowing, 2: Mixed, 3: Grazing.

|              | UA1  | UA2  | UA3  | PA1  | PA2  | PA3  |
|--------------|------|------|------|------|------|------|
| 2013         |      |      |      |      |      |      |
| PMV          | 80.5 | 45.5 | 78.7 | 95.4 | 28.5 | 64.0 |
| EMK          | 85.5 | 36.3 | 75.5 | 97.5 | 25.0 | 70.0 |
| $\mu$        | 87.1 | 37.3 | 69.1 | 97.9 | 25.0 | 71.5 |
| HDKLD        | 82.7 | 41.4 | 41.5 | 86.3 | 33.5 | 46.5 |
| BD           | 83.5 | 26.0 | 34.3 | 85.3 | 32.5 | 33.0 |
| GMK          | 87.2 | 34.8 | 68.8 | 97.4 | 26.5 | 68.5 |
| $\alpha$ GMK | 87.1 | 45.0 | 69.8 | 96.9 | 33.5 | 68.5 |
| 2014         |      |      |      |      |      |      |
| PMV          | 88.8 | 53.9 | 81.0 | 97.5 | 49.0 | 63.5 |
| EMK          | 86.8 | 51.8 | 86.4 | 94.5 | 41.0 | 80.0 |
| $\mu$        | 86.2 | 52.6 | 88.2 | 94.3 | 41.5 | 80.0 |
| HDKLD        | 84.0 | 69.5 | 47.2 | 96.4 | 58.0 | 35.5 |
| BD           | 80.7 | 56.4 | 45.0 | 86.7 | 50.5 | 37.5 |
| GMK          | 87.5 | 54.2 | 87.3 | 94.5 | 46.5 | 78.5 |
| $\alpha$ GMK | 87.9 | 52.5 | 80.3 | 96.5 | 39.5 | 78.5 |
